P979

### Persistent atrial fibrillation terminated within the left atrium without recurrence at follow-up demonstrates a gradual intracardiac organization during stepwise ablation

A. Pithon<sup>1</sup>, A. Luca<sup>1</sup>, A. Buttu<sup>2</sup>, J.M. Vesin<sup>2</sup>, L. Roten<sup>3</sup>, M. Kuhne<sup>4</sup>, F. Spiess<sup>4</sup>, S. Knecht<sup>4</sup>, C. Sticherling<sup>4</sup>, C.I. Park<sup>5</sup>, P. Pascale<sup>1</sup>, M. Le Bloa<sup>1</sup>, C. Herrera<sup>1</sup>, E. Pruvot<sup>1</sup>

<sup>1</sup>University Hospital Centre Vaudois (CHUV), Service of Cardiology, Lausanne, Switzerland; <sup>2</sup>Swiss Federal Institute of Technology of Lausanne, ASPG, Lausanne, Switzerland; <sup>3</sup>Bern University Hospital, Service of Cardiology, Bern, Switzerland; <sup>4</sup>University Hospital Basel, Service of Cardiology, Basel, Switzerland; <sup>5</sup>La Tour Hospital, Department of Cardiology, Geneva, Switzerland

**Introduction:** We previously reported that patients (pts) with recurrence (Rec) after stepwise catheter ablation (step-CA) of persistent atrial fibrillation (pAF) exhibit high bi-atrial intracardiac dominant frequencies (DF) values before ablation, indicative of a severe bi-atrial electro-anatomical remodeling.

**Purpose:** Herein, we hypothesized that a gradual decrease in DF values during step-CA is associated with pAF termination and maintenance of sinus rhythm (SR) on the long term.

**Method:** In 40 consecutive pts (61±8 yo, sustained AF duration 19±11 months), pulmonary vein isolation (PVI) and left atrium (LA) ablation were performed until pAF termination or cardioversion. 10-sec intracardiac electrograms (EGMs) epochs were recorded before ablation (BL), during PVI and during complex fractionated atrial electrograms (CFAEs) and linear ablation (post\_PVI) in the right atrial (RAA) and left atrial (LAA) appendages and in the coronary sinus (CS). DF was defined as the highest peak within the [3–15] Hz EGM spectrum. Rec was defined as any atrial arrhythmia lasting >30 sec during follow-up (FU).

**Results:** pAF was terminated within the LA in 70% (28/40, LT) of the pts, while 30% (12/40, NLT) were not. After a mean FU of 34±14 months, all NLT pts had a Rec, while LT pts presented a Rec in 71% (20/28, LT\_rec) and remained in SR in 29% (8/28, LT\_norec). Figure 1 shows: 1) a gradient in DF values measured in the LAA (panel A), RAA (panel B) and CS (panel C) with the highest values in NLT pts (red), intermediate values in LT\_rec pts (yellow) and lowest DF values in LT\_norec pts (green); 2) all three groups displayed a gradual intracardiac organization during LA ablation as shown by decreasing DF values (p<0.05, BL vs post\_PVI), but the LT\_norec pts (green) exhibited the highest relative changes in DF from BL (p<0.05, LT\_norec vs NLT, Δ range: -5.31 to -9.69%).

**Conclusion:** Low DF values before ablation and gradual intracardiac organization until pAF termination are associated with maintenance of SR on the long term.

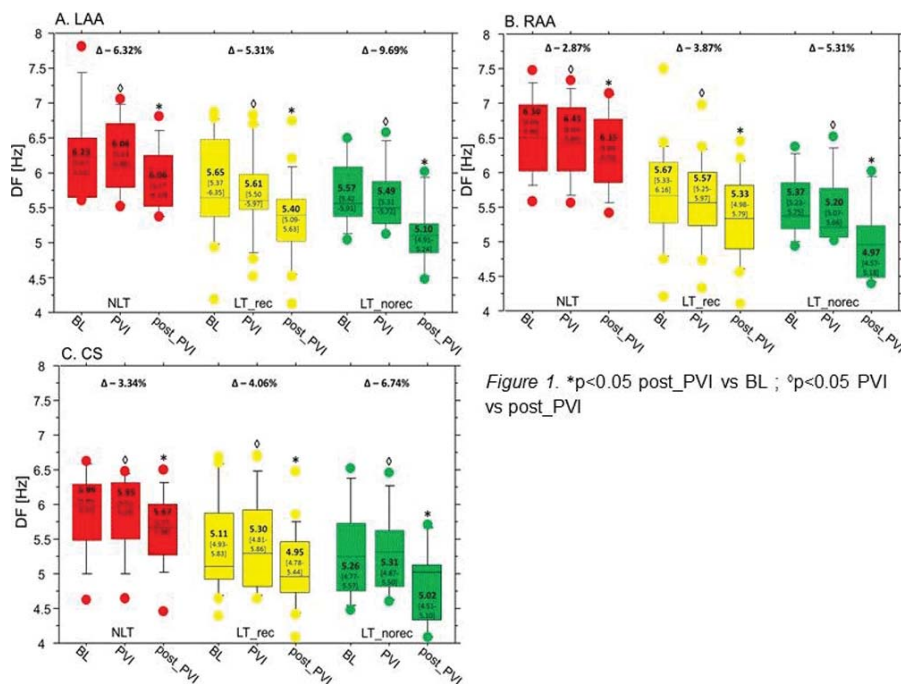

Figure 1. \*p<0.05 post\_PVI vs BL ; °p<0.05 PVI vs post\_PVI

Figure 1. Effect of ablation on DF

Downloaded from https://academic.oup.com/eurheartj/article/40/Supplement\_1/ehz747.0572/5594157 by guest on 19 April 2024
